# Supplementary material
Source: PubMed Central journal article supplement (PMC5014268)
Supplement: SD4.pdf [file SD4.pdf]

SUPPLEMENTAL TABLE 1

*Schistosoma mansoni* prevalence (%) reported in each village across the study period

|                                                               | 2009      | 2011 | 2012 | 2013      | 2014      |
|---------------------------------------------------------------|-----------|------|------|-----------|-----------|
| Assoni                                                        | 20        | 65   | 50   | 50        | 20.0      |
| Afia Magasin                                                  | 6.25      | 0    | 0    | 0         | 8.3       |
| Afia Pont                                                     | 0         | 0    | 0    | 0         | 4.8       |
| Bandafassi                                                    | 2.38      | 0    | 0    | 0         | 0         |
| Bandemba                                                      | 6.35      | 0    | 1.49 | 0         | 6.0       |
| Boundoukondi                                                  | 0         | 0    | 0    | 0         | 10        |
| Hamadi Hery                                                   | 2.44      | 0    | 2.33 | 0         | 8.8       |
| Landieni Peul                                                 | 11.76     | 0    | 0    | 0         | 0         |
| Matakossi                                                     | 0         | 0    | 4.55 | 0         | 0         |
| Ndebou                                                        | <i>nc</i> | 0    | 0    | 0         | 2.1       |
| Nianghe Peul                                                  | 0         | 0    | 0    | 0         | 27.8      |
| Santanko                                                      | 0         | 0    | 0    | <i>nc</i> | 5.3       |
| Silly                                                         | 0         | 0    | 0    | 0         | 8.3       |
| Silly Bowal                                                   | 25        | 0    | 0    | 0         | <i>nc</i> |
| Thiabadji                                                     | 0         | 0    | 0    | <i>nc</i> | 5.9       |
| Thioketian                                                    | 0         | 0    | 0    | 0         | 3.3       |
| Average prevalence for the 15 villages (i.e., without Assoni) | 3.9       | 0.0  | 0.6  | 0.0       | 6.5       |

*nc* = non-communicated data.

SUPPLEMENTAL TABLE 2

*Schistosoma haematobium* prevalence (%) reported in each village across the study period

|                                       | 2009      | 2011      | 2012 | 2013      | 2014      |
|---------------------------------------|-----------|-----------|------|-----------|-----------|
| Assoni                                | 0.0       | 0         | 5    | 0         | 0         |
| Afia Magasin                          | 12.5      | 4.5       | 0    | 5         | 0         |
| Afia Pont                             | 0.0       | 31.8      | 0    | 10        | 4.8       |
| Bandafassi                            | 9.5       | 21.7      | 2.6  | 0         | 1.2       |
| Ndebou                                | <i>nc</i> | 0         | 25.5 | 5.66      | 22.9      |
| Boundoukondi                          | 35.0      | 15.0      | 15   | 0         | 35        |
| Baraboy                               | 0.0       | 4.3       | 0    | 0         | 0         |
| Dindéfello                            | 0.0       | 0         | 0    | 0         | 3.0       |
| Damboukoye                            | <i>nc</i> | 36.4      | 0    | <i>nc</i> | 0         |
| Dongnol Nialbi                        | 5.0       | 0         | 5    | 0         | 0         |
| Ethies Bas                            | 0.0       | <i>nc</i> | 0    | <i>nc</i> | 5.3       |
| Angoussaka                            | 4.8       | <i>nc</i> | 0    | 0         | 0         |
| Guingara                              | 20.0      | 0         | 0    | 0         | 0         |
| Habibou                               | 7.1       | 0         | 10   | <i>nc</i> | 0         |
| Hamadi Hery                           | 0.0       | 13.3      | 7.0  | 10        | 3.3       |
| Bandafassi                            | 3.2       | 16.5      | 0    | 0         | 0         |
| Bandemba                              | 0.0       | 22.7      | 0    | 0         | 0         |
| Landieny Tanda                        | 0.0       | 10.0      | 0    | 0         | 11.8      |
| Lande                                 | 1.9       | 0         | 8.2  | 0         | 15.0      |
| Manda Thies                           | 0.0       | 10        | 0    | 0         | 0         |
| Matakossi                             | 0.0       | 0         | 0    | 0         | 0         |
| Nathia                                | 22.2      | 30.0      | 25   | 5.56      | 55.0      |
| Nianghe Peul                          | 31.3      | 0         | 7.1  | 0         | 36.8      |
| Namel                                 | 0.0       | 5.0       | 0    | 0         | 0         |
| Ninefasha                             | 0.0       | 0         | 1.7  | 0         | 0         |
| Patassi                               | 7.1       | 50.0      | 20   | 0         | 5.0       |
| Silly Bowal                           | 25.0      | 0         | 0    | 0         | <i>nc</i> |
| Silly                                 | 50.0      | 0         | 25   | 16.7      | 0         |
| Santanko                              | 10.0      | 10.0      | 30   | <i>nc</i> | 5.0       |
| Samal                                 | 7.5       | 0         | 0    | 0         | 0         |
| Soukouta                              | 10.5      | 15.0      | 25   | 0         | 45.0      |
| Thiarmalel                            | 5.6       | 0         | 0    | <i>nc</i> | 0         |
| Thiokoye                              | 14.7      | 0         | 0    | <i>nc</i> | 0         |
| Thiabadji                             | 0.0       | 1.5       | 0    | <i>nc</i> | 0         |
| Thioketian                            | 3.1       | 0         | 3.2  | 1.7       | 1.6       |
| Average prevalence in the 35 villages | 8.7       | 9.0       | 6.2  | 1.9       | 7.4       |

*nc* = non-communicated data.
